# Supplementary material for: Insight into structural and π–magnesium bonding characteristics of the X2Mg⋯Y (X = H, F; Y = C2H2, C2H4and C6H6) complexes
Source: Royal Society of Chemistry journal article supplement (doi:10.1039/c6ra23368f), 2016-01-01

Electronic Supplementary Information for

**Insight into structural and  $\pi$ -magnesium bonding characteristics of  
the  $X_2Mg \cdots Y$  ( $X = H, F$ ;  $Y = C_2H_2, C_2H_4$  and  $C_6H_6$ ) complexes**

Si-Yi Li, Di Wu, Ying Li\*, Dan Yu, Jia-Yuan Liu, Zhi-Ru Li

*Institute of Theoretical Chemistry, Jilin University, Changchun 130023, P. R. China*

*E-mail: liyingedu@jlu.edu.cn*

**Table S1.** Wiberg index of the C–C bond in the C<sub>2</sub>H<sub>2</sub>, C<sub>2</sub>H<sub>4</sub>, and C<sub>6</sub>H<sub>6</sub> molecules and their complexes with X<sub>2</sub>Mg (X = H, F).

|                                                   | Bond  | Wiberg bond index |
|---------------------------------------------------|-------|-------------------|
| C <sub>2</sub> H <sub>2</sub>                     | C≡C   | 3.00              |
| H <sub>2</sub> Mg···C <sub>2</sub> H <sub>2</sub> |       | 2.94              |
| F <sub>2</sub> Mg···C <sub>2</sub> H <sub>2</sub> |       | 2.95              |
| C <sub>2</sub> H <sub>4</sub>                     | C=C   | 2.04              |
| H <sub>2</sub> Mg···C <sub>2</sub> H <sub>4</sub> |       | 1.97              |
| F <sub>2</sub> Mg···C <sub>2</sub> H <sub>4</sub> |       | 1.99              |
| C <sub>6</sub> H <sub>6</sub>                     | C1–C2 | 1.44              |
| H <sub>2</sub> Mg···C <sub>6</sub> H <sub>6</sub> |       | 1.41              |
| F <sub>2</sub> Mg···C <sub>6</sub> H <sub>6</sub> |       | 1.41              |

**Table S2.** Selected harmonic vibrational frequencies ( $\nu$ ,  $\text{cm}^{-1}$ ) and corresponding Raman intensities (RI, au.) of the five monomers.

|                               | X-Mg-X sym. stretch |       | X-Mg-X antisym. stretch |    | C-C stretch |      |
|-------------------------------|---------------------|-------|-------------------------|----|-------------|------|
|                               | $\nu$               | RI    | $\nu$                   | RI | $\nu$       | RI   |
| MgH <sub>2</sub>              | 1634.2              | 496.7 | 1656.9                  | 0  |             |      |
| MgF <sub>2</sub>              | 551.4               | 4.9   | 861.1                   | 0  |             |      |
| C <sub>2</sub> H <sub>2</sub> |                     |       |                         |    | 1967.8      | 87.2 |
| C <sub>2</sub> H <sub>4</sub> |                     |       |                         |    | 1678.0      | 21.2 |
| C <sub>6</sub> H <sub>6</sub> |                     |       |                         |    | 1012.1      | 89.0 |

**Fig. S1** The optimized geometries of the  $\text{MgX}_2$  ( $X = \text{F}, \text{H}$ ),  $\text{C}_2\text{H}_2$ ,  $\text{C}_2\text{H}_4$  and  $\text{C}_6\text{H}_6$  molecules at the MP2/aug-cc-pVTZ level.

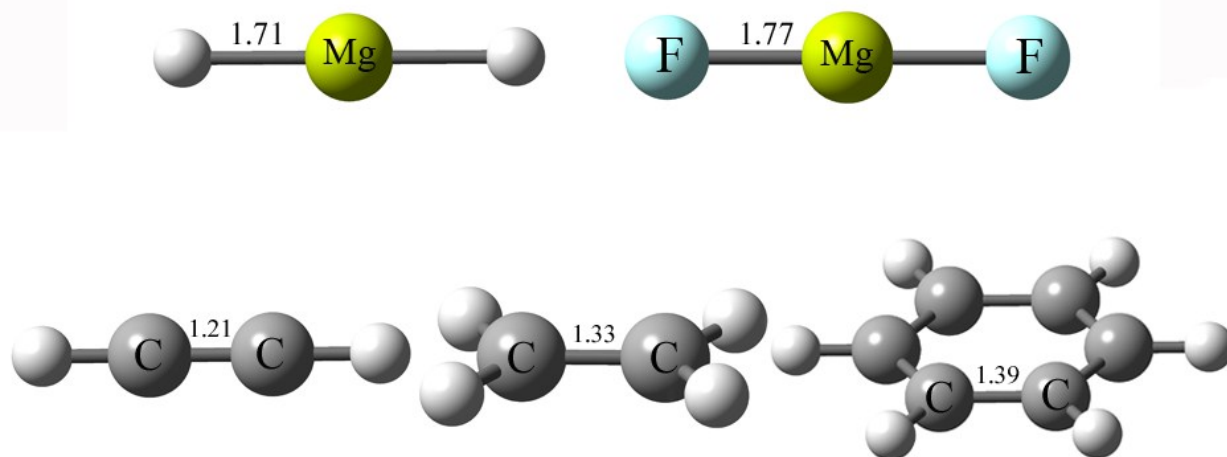

**Fig. S2** The optimized hydrogen bonding complexes between the  $\text{MgX}_2$  ( $X = \text{F}, \text{H}$ ) and  $\text{C}_2\text{H}_2$ ,  $\text{C}_2\text{H}_4$  molecules at the MP2/aug-cc-pVTZ level.

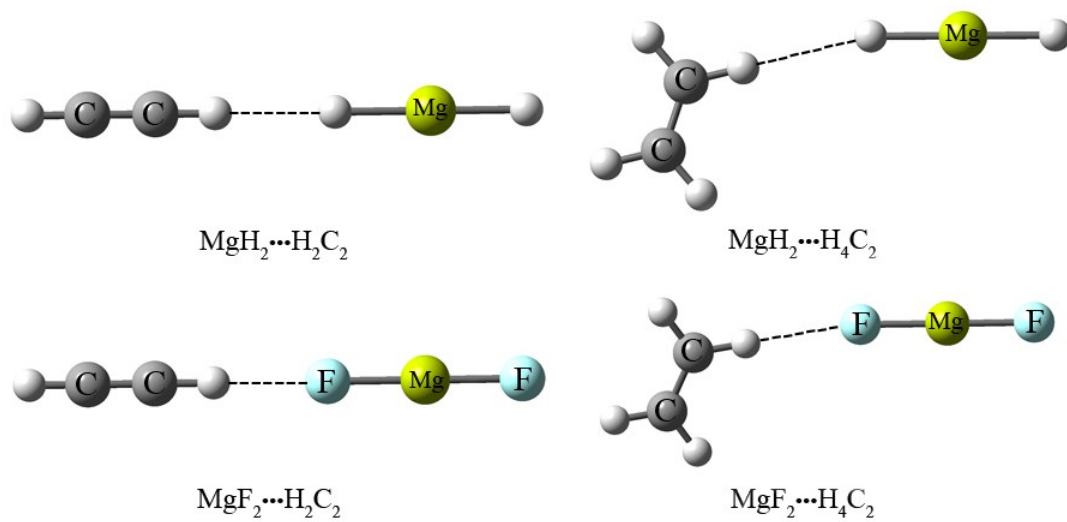

Supplement: c6ra23368f1.pdf [file c6ra23368f1.pdf]
